# Supplementary material for: Influence of Growth Medium Composition on Physiological Responses of Escherichia coli to the Action of Chloramphenicol and Ciprofloxacin
Source: BioTech (Basel). 2023 Jun 1;12(2):43. doi: 10.3390/biotech12020043 (PMC10296315; doi:10.3390/biotech12020043)
Supplement: Supplementary file 1 [file biotech-12-00043-s001.zip]

Archive with 4 entries (4 files):
- Figure S2-new.pdf
- Figure S3-new.pdf
- Figure S4-new.pdf
- Figure S1-new.pdf
